# Supplementary material
Source: publisher figshare collection journal article supplement (https://geolsoc.figshare.com/ndownloader/files/31314078)
Supplement: Supplementary file 1 [file 31314078]

## Sheet: Contents
Supplementary Material
List of sheets supplied as Supplementary Material to "K-feldspar-rich meteorite ejecta
blankets cause atmospheric change and trigger Earth crises"
SFig. 1	Extended Fig. 1 from main text
a	Example calculation of post-impact KFF* of Earth surface: the Saint Martin Impact, following the method of Coldwell & Pankhurst (2019)
b	Comparison of full geologic and impact stratigraphy
c	Comparing the temporal precision of each dataset: Rank order plots of age precision for meteorite impacts and substage duration of palaeobiological data
d	Summary database of meteorite impact size, age, and corresponding extinction intensity metrics (drawing from b & c)
e	Simultaneity calculations: "is there statistically robust correlation between the timing of meteorite impact and extinction intensity increases"? and "is there a statistically robust difference between the degree of correlation between Kfs-rich ejecta blankets and extinction intensity increases, compared with the degree of correlation between meteorite impacts that did not produce a Kfs-rich blan…
	*KFF = K-feldspar Factor, the volume percentage Kfs in a material: see Pankhurst (2017)

## Sheet: SFig 1
SFig.1.	Extended Fig. 1 from main text, including assessment of KFF of the average Earth's surface since 600 Ma from Coldwell & Pankhurst (2019).
	A) As Fig. 1, and including less well-dated meteorite impacts that together represent the 44 largest confirmed metoerite impacts of the past 600 Myr (inclusive of Woodleigh whose age precision extends to this window)
	B) Asssessment of KFF of the average Earth surface since 600 Ma, adapted and updated from Coldwell & Pankhurst 2019. Y uncertainty indicates a plausible range, not a sigma value. See Coldwell & Pankhurst (2019) for error propagation and discussion of sources of uncertaincy. A uniform 20% range is plotted here.
	C) As Fig. 1, and including names of the 23 extinction events comprising the dataset discussed in the main text.

## Sheet: a KFF calculation
a	Example calculation of post-impact KFF* of Earth surface: the Saint Martin Impact, following the method of Coldwell & Pankhurst (2019)
	Introduction
	The following is a summarised method of calculating post-strike KFF of the average global
	surface from Coldwell & Pankhurst (2019, J. Geol. Soc. 176)
Step	Description
1	Target rocks of impact crater assessed using literature reviews, and a plausible range in
	Kfs content described
2	The primary volume and distribution of ejecta blanket was estimated using
	http://impact.ese.ic.ac.uk/ImpactEffects (Collins et al. 2005, Meteoritics & Planetary Science 80)
3	The surface area of continent within, and outside, the 10 µm isopach was calculated by
	combining the location of the impact crater with tectonic reconstructions using
	GPLATES (https://gplates.org) Gurnis et al. (2012, Compters and Geosciences 38)
4	The global surface KFF post impact is the average between the KFF of the ejecta blanket times its
	fraction of subaerial extent across continental area and the KFF of the normal regime (5, as is
	today) times the remaining fration of contienental area. Calculations use equal area projections,
	and image analysis using ImageJ: imageJ.nih.gov/ij/ (Rasband 2015, US National Institutes
	of Health, Bethesda, MD)
5	Tectonic reconstruction and 4 isopachs (1 cm, 1 mm, 100 µm, and 10 µm in decreasing line width)
	illustrated using Mollweide projection (non-equal area).
	Data
	Coldwell & Pankhurst (2019 J. Geol. Soc 176) were able to suggest a range of plausible Kfs
	content of target rocks (18-28%) and scale of primary dust volume and distribution. Vol% is
	equatable with wt% since Kfs has a comparable density to that of average continental crust.
	The high precision age of 227.8 ±1.1 Ma of Schmieder et al. (2014, EPSL vol. 406) allowed for
	steps 3-5 above to be carried out
	Results
	KFF of target rocks
	high	low	mid-point
	28	18	23
	% continental area within 10 µm isopach
	42.54
	KFF of post-impact global surface area
	high	low	mid-point
	14.78	10.53	12.66
	Plot
	SFig. 1	Post-impact KFF of Saint Martin impact.

## Sheet: b Full stratigraphy
b	Comparison of full geologic and impact stratigraphy
	Introduction
	This database places updated KFF calculations post-meteorite impact from Coldwell & Pankhurst (2019), next to the raw extinction intensity data from Rohde & Muller (2005)
	The impact events are organised by age uncertainty through columns B-G for clarity (a number of age overlaps are evident). Rank order plots describing the precision of each dataset is provided in "d".
	The impact events summary (column H-M) denotes those palaeobiological time periods that span the time during which one or more impacts occurred, which are used for statistical analysis in "e"
	Palaeobiological data (N-X) collates the works of Bambach (2006) and Rohde & Muller (2005). Where ages according to the current (May 2021) International Commission on Stratigraphy (ICS) differ from Rohde & Muller (2005) the ICS age is used to populate the binarise exctinction "events", albeit that debate continues as to the details of extinction event timings in some cases. The End Triassic is ta…
	Database
	Table S1: Collation of Kfs pulse, meteorite impact data, and palaeobiological data summarising the history of multicellular life, arranged by ascending age.
	Meteorite impact and plausible temperal overlap into geological substages according to age precision												Palaeobiological data
	Impact events						Impact events summary						Bambach (2006)			(% of marine genera in their last appearance)						Calculations
							Time bin(s) corresponding to plausible age range		Most probable in range					Plus 5 notable extinction events in well-resolved genera data		Time Scale					Extinction Intensity	Absolute increase from previous	% change from previous
	Crater name	KFF	Crater name	KFF	Crater name	KFF	Kfs rich?		Kfs rich?							From Rohde & Muller (2005)		Start	End	Duration
							Yes	No	Yes	binarised	No	binarised			binarised	Short ID	Name
										0		0			0	Q.Plei	Pleistocene	1.806	0.0114	1.7946	1.2482	0	-169.188
										0		0	Pliocene		0	T.Plio-u	Gelasian & Piacenzian	3.6	1.806	1.794	3.36	0.2774	8.9989
	El'gy.	6					Y		El'gy.	1		0		Pliocene	1	T.Plio-l	Zanclean	5.332	3.6	1.732	3.0826	1.1847	62.4216
										0		0			0	T.Mi-u-u	Messinian	7.246	5.332	1.914	1.8979	0	-23.7895
										0		0			0	T.Mi-u-l	Tortonian	11.608	7.246	4.362	2.3494	0	-97.6249
	Ries	7					Y		Ries	1		0		Mid-Mio.	1	T.Mi-m	Middle Miocene	15.97	11.608	4.362	4.643	2.6133	128.753
										0		0			0	T.Mi-l-u	Burdigalian	20.43	15.97	4.46	2.0297	0.3322	19.57
	Haughton	4.9						N		0		0			0	T.Mi-l-l	Aquitanian	23.03	20.43	2.6	1.6975	0.0936	5.83578
								N		0	Haughton	1			0	T.Ol-u	Chattian	28.4	23.03	5.37	1.6039	0	-210.761
										0		0			0	T.Ol-l	Rupelian	33.9	28.4	5.5	4.9843	0	-148.167
	C'pk Bay	10.7	Popigai	21.7	Mistastin	7.4	Y		CB. Po.	1		0	late Eocene	End-Eoc.	1	T.Eo-u	Priabonian	37.2	33.9	3.3	12.3694	8.6751	234.824
							Y		Mistastin	1		0			0	T.Eo-m-u	Bartonian	40.4	37.2	3.2	3.6943	0.2916	8.56967
										0		0			0	T.Eo-m-l	Lutetian	48.6	40.4	8.2	3.4027	0	-0.0411438
	Kamensk	4.4	Montag.	3.1				N		0	Kam. Mon.	1			0	T.Eo-l	Ypresian	55.8	48.6	7.2	3.4041	0.8194	31.7019
										0		0			0	T.Than-u	Upper Thanetian	58	55.8	2.2	2.5847	0	-56.8964
										0		0			0	T.Than-l	Lower Thanetian	60.2	58	2.2	4.0553	0	-7.43472
										0		0			0	T.Dani-u	Upper Danian	62.85	60.2	2.65	4.3568	0.6925	18.8986
	Boltysh	8.3					Y			0		0			0	T.Dani-l	Lower Danian	65.5	62.85	2.65	3.6643	0	-743.353
			Chicxulub	27.3			Y		Ch'b. Bolt.	1		0	late Maastrichtian	End Cret.	1	K.Maes-u	Upper Maestrichtian	68.05	65.5	2.55	30.903	14.7579	91.4079
					Kara	3.2		N		0		0			0	K.Maes-l	Lower Maestrichtian	70.6	68.05	2.55	16.1451	9.7812	153.698
	Manson	4.49008	Lappajarvi	5				N		0	Mans. Lap. Kara	1			0	K.Camp-u	Upper Campanian	77.05	70.6	6.45	6.3639	0.2447	3.99889
								N		0		0			0	K.Camp-l	Lower Campanian	83.5	77.05	6.45	6.1192	3.3171	118.379
										0		0			0	K.Sant-u	Upper Santonian	84.65	83.5	1.15	2.8021	0.137	5.14052
										0		0			0	K.Sant-l	Lower Santonian	85.8	84.65	1.15	2.6651	1.5266	134.089
										0		0			0	K.Coni-u	Upper Coniacian	87.55	85.8	1.75	1.1385	0	-20.4392
										0		0			0	K.Coni-l	Lower Coniacian	89.3	87.55	1.75	1.3712	0	-129.485
										0		0			0	K.Turo-u	Upper Turonian	91.4	89.3	2.1	3.1467	0	-22.8557
										0		0			0	K.Turo-l	Lower Turonian	93.5	91.4	2.1	3.8659	0	-100.054
										0		0	late Cenomanian	Cenomanian	1	K.Ceno-u	Upper Cenomanian	95.5333	93.5	2.0333	7.7339	3.623	88.1316
										0		0			0	K.Ceno-m	Middle Cenomanian	97.5667	95.5333	2.0334	4.1109	0	-45.4523
										0		0			0	K.Ceno-l	Lower Cenomanian	99.6	97.5667	2.0333	5.9794	0	-10.9058
										0		0			0	K.Albi-u	Upper Albian	103.733	99.6	4.1333	6.6315	2.1841	49.1096
										0		0			0	K.Albi-m	Middle Albian	107.867	103.733	4.1334	4.4474	0.5286	13.4888
										0		0			0	K.Albi-l	Lower Albian	112	107.867	4.1333	3.9188	0	-62.9734
										0		0			0	K.Apti-u	Upper Aptian	118.5	112	6.5	6.3866	0	-19.865
	Took.	3.4						N		0		0		Aptian	1	K.Apti-l	Lower Aptian	125	118.5	6.5	7.6553	3.9551	106.889
								N		0	Took.	1			0	K.Barr-u	Upper Barremian	127.5	125	2.5	3.7002	0	-2.99173
										0		0			0	K.Barr-l	Lower Barremian	130	127.5	2.5	3.8109	1.4037	58.3126
	Steen River	5.8						N		0	S. River	1			0	K.Haut-u	Upper Hautervian	133.2	130	3.2	2.4072	0	-48.0641
								N		0		0			0	K.Haut-l	Lower Hautervian	136.4	133.2	3.2	3.5642	0	-3.05258
										0		0			0	K.Vala-u	Upper Valanginian	138.3	136.4	1.9	3.673	0	-18.0561
										0		0			0	K.Vala-l	Lower Valanginian	140.2	138.3	1.9	4.3362	1.0029	30.0873
	Mjonir	3	G. Bluff	5	Dellen	5.4		N		0	G.B. Dellen	1			0	K.Berr-u	Upper Berriasian	142.85	140.2	2.65	3.3333	0.7374	28.4063
								N		0	Mjonir	1			0	K.Berr-l	Lower Berriasian	145.5	142.85	2.65	2.5959	0	-406.36
	Morok.	21.6					Y		Morok	1		0	late Tithonian	End-Jur.	1	J.Tith-u	Upper Tithonian	148.15	145.5	2.65	13.1446	4.7739	57.0311
										0		0			0	J.Tith-l	Lower Tithonian	150.8	148.15	2.65	8.3707	2.2222	36.1421
										0		0			0	J.Kimm-u	Upper Kimmeridgian	153.25	150.8	2.45	6.1485	0	-2.4445
										0		0			0	J.Kimm-l	Lower Kimmeridgian	155.7	153.25	2.45	6.2988	0.6151	10.8222
										0		0			0	J.Oxfo-u	Upper Oxfordian	157.533	155.7	1.8333	5.6837	2.8668	101.771
										0		0			0	J.Oxfo-m	Middle Oxfordian	159.367	157.533	1.8334	2.8169	0	-61.5286
										0		0			0	J.Oxfo-l	Lower Oxfordian	161.2	159.367	1.8333	4.5501	0	-22.9182
	Obolon'	5.54764						N		0		0			0	J.Call-u	Upper Callovian	162.367	161.2	1.1667	5.5929	0.8072	16.8669
								N		0		0			0	J.Call-m	Middle Callovian	163.533	162.367	1.1666	4.7857	0	-18.2063
								N		0		0			0	J.Call-l	Lower Callovian	164.7	163.533	1.1667	5.657	0.8848	18.5407
								N		0		0			0	J.Bath-u	Upper Bathonian	165.7	164.7	1	4.7722	1.903	66.3251
								N		0		0			0	J.Bath-m	Middle Bathonian	166.7	165.7	1	2.8692	0	-10.3618
								N		0		0			0	J.Bath-l	Lower Bathonian	167.7	166.7	1	3.1665	0	-87.0898
								N		0	Obolon'	1			0	J.Bajo-u	Upper Bajocian	169.65	167.7	1.95	5.9242	0	-14.331
								N		0		0			0	J.Bajo-l	Lower Bajocian	171.6	169.65	1.95	6.7732	3.2767	93.7137
								N		0		0			0	J.Aale	Aalenian	175.6	171.6	4	3.4965	0	-58.6444
								N		0		0			0	J.Toar-u	Upper Toarcian	179.3	175.6	3.7	5.547	0	-58.3054
										0		0	Pliensbachian/ early Toarcian		0	J.Toar-l	Lower Toarcian	183	179.3	3.7	8.7812	0	-17.1526
										0		0		Toarcian	1	J.Plie-u	Upper Pliensbachian	186.3	183	3.3	10.2874	4.0723	65.5227
										0		0			0	J.Plie-l	Lower Pliensbachian	189.6	186.3	3.3	6.2151	2.9949	93.0035
	Puchezh-Katunki	4.2						N		0	P-K	1			0	J.Sine-u	Upper Sinemurian	193.05	189.6	3.45	3.2202	0.3602	12.5944
								N		0		0			0	J.Sine-l	Lower Sinemurian	196.5	193.05	3.45	2.86	1.4204	98.6663
										0		0			0	J.Hett-u	Upper Hettangian	198.05	196.5	1.55	1.4396	0.0949	7.05734
										0		0			0	J.Hett-l	Lower Hettangian	199.6	198.05	1.55	1.3447	0	-2045.45
										0		0	late Norian/ Rhaetian	End-Tri	1	Tr.Rhae	Rhaetian	203.6	199.6	4	28.8499	12.222	73.503
	Rochech.	8.6					Y		Rochech.	1		0			1	Tr.Nori-u	Upper Norian	207.9	203.6	4.3	16.6279	6.6671	66.9334
										0		0			0	Tr.Nori-m	Middle Norian	212.2	207.9	4.3	9.9608	0	-11.5483
	M'gan	3						N		0	M'gan	1			0	Tr.Nori-l	Lower Norian	216.5	212.2	4.3	11.1111	0	-5.25061
										0		0			0	Tr.Carn-u	Upper Carnian	222.25	216.5	5.75	11.6945	0	-3.87789
	St. Martin	12.7					Y		St. Martin	1		0		Carnian	1	Tr.Carn-l	Lower Carnian	228	222.25	5.75	12.148	6.1428	102.291
							Y			0		0			0	Tr.Ladi-u	Upper Ladinian	232.5	228	4.5	6.0052	0	-3.96989
										0		0			0	Tr.Ladi-l	Lower Ladinian	237	232.5	4.5	6.2436	1.3319	27.1169
										0		0			0	Tr.Anis-u	Upper Anisian	239.667	237	2.6667	4.9117	1.1855	31.8153
										0		0			0	Tr.Anis-m	Middle Anisian	242.333	239.667	2.6666	3.7262	0	-8.43218
										0		0			0	Tr.Anis-l	Lower Anisian	245	242.333	2.6667	4.0404	0	-49.203
										0		0			0	Tr.Olen-u	Upper Olenekian	247.35	245	2.35	6.0284	3.9142	185.139
										0		0			0	Tr.Olen-l	Lower Olenekian	249.7	247.35	2.35	2.1142	0	-115.514
	Arag.	16.7								0		0			0	Tr.Indu-u	Upper Induan	250.35	249.7	0.65	4.5564	0	-96.3173
							Y			0		0			0	Tr.Indu-l	Lower Induan	251	250.35	0.65	8.945	0	-474.15
							Y		Arag.	1		0	Changhsingian	End-Per	1	P.Dora	Dorashamian	253.8	251	2.8	51.3577	22.9723	80.93
							Y			0		0			0	P.Djhu	Djhulfian	260.4	253.8	6.6	28.3854	0	-24.4506
										0		0	late Guadalupian	Capitanian	1	P.Guad-u	Upper Guadalupian	265.5	260.4	5.1	35.3258	19.6069	124.735
										0		0			0	P.Guad-l	Lower Guadalupian	270.6	265.5	5.1	15.7189	5.1181	48.2803
										0		0			0	P.Leon-u	Upper Leonardian	275.2	270.6	4.6	10.6008	4.3216	68.8241
										0		0			0	P.Leon-m	Middle Leonardian	279.8	275.2	4.6	6.2792	0	-8.56956
	C'water West	4.6						N		0		0			0	P.Leon-l	Lower Leonardian	284.4	279.8	4.6	6.8173	0.2166	3.28147
								N		0	C'water W	1			0	P.Sakm-u	Upper Sakmarian	289.5	284.4	5.1	6.6007	1.8194	38.0524
								N		0		0			0	P.Sakm-l	Lower Sakmarian	294.6	289.5	5.1	4.7813	2.5754	116.751
										0		0			0	P.Asse-u	Upper Asselian	296.8	294.6	2.2	2.2059	0	-10.005
										0		0			0	P.Asse-l	Lower Asselian	299	296.8	2.2	2.4266	0	-483.067
										0		0			0	C.Step-u	Gzhelian	303.9	299	4.9	14.1487	6.1156	76.13
										0		0			0	C.Step-l	Kasimovian	306.5	303.9	2.6	8.0331	0	-39.5763
										0		0			0	C.Mosc-u	Upper Moscovian	309.1	306.5	2.6	11.2123	4.0694	56.9713
										0		0			0	C.Mosc-l	Lower Moscovian	311.7	309.1	2.6	7.1429	3.0981	76.5946
										0		0			0	C.Bash-u	Upper Bashkirian	314.9	311.7	3.2	4.0448	0	-51.7257
										0		0			0	C.Bash-l	Lower Bashkirian	318.1	314.9	3.2	6.137	0	-28.4455
										0		0			0	C.Serp-u	Upper Serpukhovian	322.25	318.1	4.15	7.8827	0	-179.012
										0		0	early Serpukhovian	early Serpukhovian	1	C.Serp-l	Lower Serpukhovian	326.4	322.25	4.15	21.9937	5.942	37.0179
										0		0			0	C.Vise-u	Upper Visean	335.85	326.4	9.45	16.0517	0	-2.6938
										0		0		Visean	1	C.Vise-l	Lower Visean	345.3	335.85	9.45	16.4841	6.8862	71.7469
										0		0			0	C.Tour-u	Upper Tournaisian	352.25	345.3	6.95	9.5979	0.3028	3.25763
										0		0			0	C.Tour-l	Lower Tournaisian	359.2	352.25	6.95	9.2951	0	-97.2448
										0		0	late Famennian	Hangenberg	1	D.Fame-u	Upper Famennian	364.3	359.2	5.1	18.3341	9.7007	112.362
										0		0			0	D.Fame-m	Middle Famennian	369.4	364.3	5.1	8.6334	0.7722	9.82293
										0		0			0	D.Fame-l	Lower Famennian	374.5	369.4	5.1	7.8612	0	-189.761
			Siljan 27.8	27.8			Y			0		0	late Frasnian	Frasnian	1	D.Fras-u	Upper Frasnian	378.1	374.5	3.6	22.7787	10.7	88.5857
							Y		Siljan	1		0			0	D.Fras-m	Middle Frasnian	381.7	378.1	3.6	12.0787	1.233	11.3686
	Alamo	1.6					Y	N		0	Alamo	1			0	D.Fras-l	Lower Frasnian	385.3	381.7	3.6	10.8457	0	-79.9294
										0		0	late Givetian	late Givetian	1	D.Give-u	Upper Givetian	388.55	385.3	3.25	19.5146	2.6526	15.7312
										0		0			0	D.Give-l	Lower Givetian	391.8	388.55	3.25	16.862	2.2891	15.7079
										0		0			0	D.Eife-u	Upper Eifelian	394.65	391.8	2.85	14.5729	0.4688	3.32386
										0		0			0	D.Eife-l	Lower Eifelian	397.5	394.65	2.85	14.1041	1.7644	14.2986
										0		0			0	D.Emsi-u	Upper Emsian	402.25	397.5	4.75	12.3397	0.0002	0.00162081
										0		0			0	D.Emsi-l	Lower Emsian	407	402.25	4.75	12.3395	7.9229	179.389
										0		0			0	D.Sieg-u	Upper Siegenian	409.1	407	2.1	4.4166	0	-56.3442
										0		0			0	D.Sieg-l	Lower Siegenian	411.2	409.1	2.1	6.9051	0	-21.9389
										0		0			0	D.Gedi-u	Upper Gedinnian	413.6	411.2	2.4	8.42	0	-9.90736
										0		0			0	D.Gedi-l	Lower Gedinnian	416	413.6	2.4	9.2542	0	-79.7195
										0		0			0	S.Prid	Pridoli	418.7	416	2.7	16.6316	0.8421	5.33329
										0		0			0	S.Ludl-u	Ludfordian	421.3	418.7	2.6	15.7895	0	-0.243833
										0		0		Lau event	1	S.Ludl-l	Gorstian	422.9	421.3	1.6	15.828	5.3088	50.4677
										0		0			0	S.Wenl-u	Homerian	426.2	422.9	3.3	10.5192	0.5431	5.44401
										0		0			0	S.Wenl-l	Sheinwoodian	428.2	426.2	2	9.9761	2.4167	31.9695
										0		0			0	S.Ldov-u	Telychian	436	428.2	7.8	7.5594	0.8206	12.1772
										0		0			0	S.Ldov-m	Aeronian	439	436	3	6.7388	0	-18.4439
	Charlevoix	12.9					Y			0		0			0	S.Ldov-l	Rhuddanian	443.7	439	4.7	7.9817	0	-226.149
							Y			0		0			0	O.Ashg-u	Upper Ashgill	445.467	443.7	1.7667	26.0322	0	-14.4106
							Y		Charlevoix	1		0	mid & late Ashgillian	End-Ordovician	1	O.Ashg-m	Middle Ashgill	447.233	445.467	1.7666	29.7836	20.2929	213.819
							Y			0		0			0	O.Ashg-l	Lower Ashgill	449	447.233	1.7667	9.4907	0	-11.0455
							Y			0		0			0	O.Cara-u	Upper Caradoc	452.967	449	3.9667	10.539	0	-23.2157
										0		0			0	O.Cara-m	Middle Caradoc	456.933	452.967	3.9666	12.9857	0.4522	3.60793
	C'water East	5						N		0		0			0	O.Cara-l	Lower Caradoc	460.9	456.933	3.9667	12.5335	5.3974	75.6352
								N		0		0			0	O.Llde-u	Upper Llandeilo	462.45	460.9	1.55	7.1361	0.2507	3.64104
								N		0		0			0	O.Llde-l	Lower Llandeilo	464	462.45	1.55	6.8854	0	-20.2123
								N		0	C'water E.	1			0	O.Llvi-u	Upper Llanvirn	467.9	464	3.9	8.2771	0	-79.6003
			Lawn Hill	4.9				N		0		0			0	O.Llvi-l	Lower Llanvirn	471.8	467.9	3.9	14.8657	4.6887	46.0715
								N		0		0			0	O.Aren-u	Upper Arenig	475.2	471.8	3.4	10.177	0	-16.3909
								N		0	Lawn Hill	1			0	O.Aren-l	Lower Arenig	478.6	475.2	3.4	11.8451	0	-72.5633
								N		0		0			0	O.Trem-u	Upper Tremadocian	483.45	478.6	4.85	20.4403	0	-3.57969
	Carswell	8.2					Y	N	Carswell	1		0			0	O.Trem-l	Lower Tremadocian	488.3	483.45	4.85	21.172	0	-30.1842
							Y			0		0	late Trempealeauan	End-Cambrian	1	Cm.Trep-u	Upper Trempealeauan	490.4	488.3	2.1	27.5626	17.1003	163.447
										0		0			0	Cm.Trep-l	Lower Trempealeauan	492.5	490.4	2.1	10.4623	0	-75.1489
										0		0			0	Cm.Fran-u	Upper Franconian	494.65	492.5	2.15	18.3246	0	-10.9929
										0		0	early Franconian	early Franconian	1	Cm.Fran-l	Lower Franconian	496.8	494.65	2.15	20.339	1.2774	6.70143
										0		0			0	Cm.Dres-u	Upper Dresbachian	498.9	496.8	2.1	19.0616	0	-107.839
										0		0	early Dresbachian	early Dresbachian	1	Cm.Dres-l	Lower Dresbachian	501	498.9	2.1	39.6175	11.9513	43.1982
										0		0			0	Cm.uMid-u	Upper Up-Mid Cambrian	502.333	501	1.3333	27.6662	2.625	10.4827
										0		0			0	Cm.uMid-m	Middle Up-Mid Cambrian	503.667	502.333	1.3334	25.0412	6.1018	32.2175
										0		0			0	Cm.uMid-l	Lower Up-Mid Cambrian	505	503.667	1.3333	18.9394	0	-24.4876
										0		0			0	Cm.mMid-u	Upper Mid-Mid Cambrian	507	505	2	23.5772	9.0783	62.6137
										0		0			0	Cm.mMid-l	Lower Mid-Mid Cambrian	509	507	2	14.4989	0.2748	1.93193
										0		0			0	Cm.lMid	Lower Middle Cambrian	513	509	4	14.2241	0	-10.5399
										0		0			0	Cm.Tojo-u	Upper Toyonian	515.75	513	2.75	15.7233	2.7996	21.6625
										0		0			0	Cm.Tojo-l	Lower Toyonian	518.5	515.75	2.75	12.9237	0	-218.738
										0		0	late Botomian	late Botomian	1	Cm.Boto-u	Upper Botomanian	521.25	518.5	2.75	41.1928	13.3577	47.9887
										0		0			0	Cm.Boto-l	Lower Botomanian	524	521.25	2.75	27.8351	17.2092	161.955
										0		0			0	Cm.Atda-u	Upper Atdabanian	527	524	3	10.6259	1.6515	18.4023
										0		0			0	Cm.Atda-l	Lower Atdabanian	530	527	3	8.9744	0	-83.0607
										0		0			0	Cm.Tomm-u	Upper Tommotian	532	530	2	16.4286	8.3478	103.304
										0		0			0	Cm.Tomm-l	Lower Tommotian	534	532	2	8.0808	3.8255	89.8997
										0		0			0	V.N-Da-u	Upper Nemakit-Daldynian	538	534	4	4.2553	0	-193.751
										0		0			0	V.N-Da-l	Lower Nemakit-Daldynian	542	538	4	12.5	12.5
										0		0			0	V.u	Upper Vendian	564.667	542	22.6667	0	0
																			Average	3.38117	10.1363	2.30896	#DIV/0!
	Plots
	SFig. 2a	Plot of extinction intensity with time using 167 substages.						SFig. 2b	Plot of extinction intensity increases through time, calculated by percentage increase above previous substage.
	Discussion
	Meteorite impacts that caused Kfs-rich ejecta blankets correspond to geological substages containing high extinction intensity.
	Meteorite impacts that did not cause Kfs-rich ejecta blankets do not correspond to geological substages containing high extinction intensity.
	The overall decrease in extinction intensity limits direct comparison across this timescale. Percentage increase above previous highlights severe mass extinction episodes, eliminates the long-term trend, yet also potentially overstates the significance of small absolute increases, which in turn obscures true mass extinction events.

## Sheet: c Temporal precision
c	Comparing the temporal precision of each dataset: Rank order plots of age precision for meteorite impacts and substage duration of palaeobiological data								Plots
									SFig. 3	Normalised rank order of meteorite impact and geological substage temporal ranges, Kfs content also indicated. Labels denote how many substages the specific meteorite impact overlaps.
	Introduction
	The palaeontological time bins and meteorite impact age spans are plotted in rank order to compare the temporal precision of the datasets.
	The palaeontological time bins range in duration from 0.65 to 9.45 myr (and an outlier at 22.6 myr).
	The meteorite age 2σ precision ranges from ±0.038 to ±8 myr (i.e. spans from 0.076 to 16.0 Ma)
	For the comparisons described in sheets "b & c" and the main text, the specific number of substages an impact could plausibly correspond to is labelled.
	Data
	Table S2: Age precision and rank order of well-dated meteorite impacts from Coldwell & Pankhurst (2019) updated using Schmieder & Kring (2009), and duration of geological stages/sub-stages as reported in Rohde & Muller (2005)
	Palaeobiological data		Meteorite Impact
	Normalised Rank Order	(duration myr)	Normalised Rank Order	Age precision (myr)	max range	Name	KFF of global surface post-impact	Number of substages overlapped
	0.5988	0.65	34.375	0.5	1	Alamo	1.56996	1
	1.1976	0.65	9.375	0.05	0.1	Manicouagan	3	1
	1.7964	1	71.875	2	4	Mjonir	3.02458	2		Discussion
	2.3952	1	68.75	1.6	3.2	Montagnais	3.06789	1
	2.994	1	78.125	2.2	4.4	Kara	3.2	2		The ages of major meteorite impacts are more precise than that of the time-spans of geological substages, on a rank order basis.
	3.5928	1.15	56.25	1	2	Tookoonooka	3.3721	2
	4.1916	1.15	75	2	4	Puchezh-Katunki	4.15076	2		There is no obvious bias between the precision of meteorite ages corresponding to either Kfs-rich or Kfs-poor ejecta blankets with regard to how many geological substages those ages could correspond to.
	4.7904	1.1666	31.25	0.4	0.8	Kamensk	4.3638	1
	5.3892	1.1667	18.75	0.1	0.2	Manson	4.49008	1
	5.988	1.1667	81.25	2.6	5.2	Clearwater West	4.6	3
	6.5868	1.3333	100	8	16	Lawn Hill	4.9	5
	7.1856	1.3333	59.375	1	2	Haughton	4.90403	2
	7.7844	1.3334	43.75	0.78	1.56	Lappajarvi	5	2
	8.3832	1.55	46.875	0.8	1.6	Gosses' Bluff	5	2
	8.982	1.55	90.625	5	10	Clearwater East	5	5
	9.5808	1.55	37.5	0.51	1.02	Dellen	5.40672	1
	10.1796	1.55	96.875	7	14	Obolon'	5.54764	10
	10.7784	1.6	62.5	1.3	2.6	Steen River	5.7	2
	11.3772	1.732	15.625	0.08	0.16	El'gygytygn	6.03982	1
	11.976	1.75	3.125	0.038	0.076	Ries	6.97979	1
	12.5748	1.75	12.5	0.05	0.1	Mistastin	7.44389	2
	13.1736	1.7666	65.625	1.5	3	Carswell	8.2	2
	13.7724	1.7667	40.625	0.67	1.34	Boltysh	8.33228	2
	14.3712	1.7667	25	0.32	0.64	Rochechouart	8.57487	1
	14.97	1.794	28.125	0.32	0.64	Chesapeake Bay	10.6803	1
	15.5688	1.7946	50	0.9	1.8	Saint Martin	12.7	2
	16.1676	1.8333	93.75	6.5	13	Charlevoix	12.9	5
	16.7664	1.8333	84.375	2.9	5.8	Aragauinha	16.6648	3
	17.3652	1.8334	21.875	0.16	0.32	Morokweng	21.5744	1
	17.964	1.9	53.125	0.92	1.84	Popigai	21.6715	1
	18.5628	1.9	6.25	0.043	0.086	Chicxulub	27.255	1
	19.1616	1.914	87.5	4.6	9.2	Siljan	27.8125	3
	19.7604	1.95
	20.3592	1.95
	20.958	2
	21.5568	2
	22.1556	2
	22.7544	2
	23.3532	2
	23.952	2.0333
	24.5508	2.0333
	25.1496	2.0334
	25.7484	2.1
	26.3472	2.1
	26.946	2.1
	27.5448	2.1
	28.1436	2.1
	28.7424	2.1
	29.3412	2.1
	29.94	2.1
	30.5388	2.15
	31.1376	2.15
	31.7364	2.2
	32.3352	2.2
	32.934	2.2
	33.5328	2.2
	34.1316	2.35
	34.7304	2.35
	35.3292	2.4
	35.928	2.4
	36.5268	2.45
	37.1256	2.45
	37.7244	2.5
	38.3232	2.5
	38.922	2.55
	39.5208	2.55
	40.1196	2.6
	40.7184	2.6
	41.3172	2.6
	41.916	2.6
	42.5148	2.6
	43.1136	2.65
	43.7124	2.65
	44.3112	2.65
	44.91	2.65
	45.5088	2.65
	46.1076	2.65
	46.7064	2.6666
	47.3052	2.6667
	47.904	2.6667
	48.5028	2.7
	49.1016	2.75
	49.7004	2.75
	50.2992	2.75
	50.898	2.75
	51.4968	2.8
	52.0956	2.85
	52.6944	2.85
	53.2932	3
	53.892	3
	54.4908	3
	55.0896	3.2
	55.6884	3.2
	56.2872	3.2
	56.886	3.2
	57.4848	3.2
	58.0836	3.25
	58.6824	3.25
	59.2812	3.3
	59.88	3.3
	60.4788	3.3
	61.0776	3.3
	61.6764	3.4
	62.2752	3.4
	62.874	3.45
	63.4728	3.45
	64.0716	3.6
	64.6704	3.6
	65.2692	3.6
	65.868	3.7
	66.4668	3.7
	67.0656	3.9
	67.6644	3.9
	68.2632	3.9666
	68.862	3.9667
	69.4608	3.9667
	70.0596	4
	70.6584	4
	71.2572	4
	71.856	4
	72.4548	4
	73.0536	4.1333
	73.6524	4.1333
	74.2512	4.1334
	74.85	4.15
	75.4488	4.15
	76.0476	4.3
	76.6464	4.3
	77.2452	4.3
	77.844	4.362
	78.4428	4.362
	79.0416	4.46
	79.6404	4.5
	80.2392	4.5
	80.838	4.6
	81.4368	4.6
	82.0356	4.6
	82.6344	4.7
	83.2332	4.75
	83.832	4.75
	84.4308	4.85
	85.0296	4.85
	85.6284	4.9
	86.2272	5.1
	86.826	5.1
	87.4248	5.1
	88.0236	5.1
	88.6224	5.1
	89.2212	5.1
	89.82	5.1
	90.4188	5.37
	91.0176	5.5
	91.6164	5.75
	92.2152	5.75
	92.814	6.45
	93.4128	6.45
	94.0116	6.5
	94.6104	6.5
	95.2092	6.6
	95.808	6.95
	96.4068	6.95
	97.0056	7.2
	97.6044	7.8
	98.2032	8.2
	98.802	9.45
	99.4008	9.45
	99.9996	22.6667

## Sheet: d Database
d	Summary database of meteorite impact size, age, and corresponding extinction intensity metrics (drawing from b & c)
	Data
	Table S3: Meteorite impact size, corresponding extinction intensity metrics, and KFF of post-impact Earth surface.
	Maxiumum spead of plausible values of exinction intensity are provided for each imact event. Some impact events have more precise ages, yet span 2 substages and as such are not plotted in Fig. 2.
	Meteorite Impacts								Fossil record																						KFF of post-impact Earth surface**	Notes
	Crater name	Transient crater diameter	+-10%	Age (Ma)	Precision (±myr)	Primary source for age date^	Method of dating	Year of study		Extinction intensity*									Values used for plotting points
									# Substages spanned by impact age range (2σ)	Absolute extinction intensity in age range			Absolute extinction intensity increase from previous in age range			% increase in extintion intensity above previous substage in age range
										highest	lowest	most prob	highest	lowest	most prob	highest	lowest	most prob	Absolute extinction intensity	spread high	spread low	Most robust subset	Absolute increase from previous	spread high	spread low	Most robust subset	% change from previous	spread high	spread low	Most robust subset
	Alamo	37	3.7	382.1	0.5	Morrow (2009)	stratigraphic	2009	1			10.8457			0			0	10.8457	0	0	10.8457	0	0	0	0	0	0	0	0	1.56996
	Manicouagan	48	4.8	215.56	0.05	Ramezani et al. (2005)	U-Pb (ID-TIMS, meltgrown zircons)	2005	1			11.1111			0			0	11.1111	0	0	11.1111	0	0	0	0	0	0	0	0	3
	Mjonir	23	2.3	143	2	Smelror et al. (2001)	Stratigraphic	2001	2	3.3333	2.5959	0.7374	0.7374	0	0.7374	28.4063	0	0	2.5959	0.7374	0		0	0.7374	0		0	28.4063	0		3.02458
	Montagnais	26	2.6	51.1	1.6	Schmieder and Kring (2019) recalculated Bottomley and York (1988)	Ar-Ar (impact melt rock)	2019	1			3.4041			0.8194			31.7019	3.4041	0	0	3.4041	0.8194	0	0	0.8194	31.7019	0	0	31.7019	3.06789
	Kara	37	3.7	70.7	2.2	Schmieder and Kring (2019) recalculated Trieloff (1998)	Ar-Ar (impact melt rock)	2019	2	16.1451	6.3639	9.7812	9.7812	0.2447	9.5365	153.698	3.99889	3.99889	6.3639	9.7812	0		0.2447	9.5365	0		3.99889	149.699	0		3.2
	Tookoonooka	31	3.1	125	1	Bron and Gostin (2012)	Stratigraphic	2012	2	7.6553	3.7002	3.9551	3.9551	0	3.9551	106.889	0	0	3.7002	3.9551	0		0	3.9551	0		0	106.889	0		3.3721
	Puchezh-Katunki	23	2.3	194	2	Holm-Alwmark et al. (2019)	Ar-Ar (impact melt rock)	2019	2	3.2202	2.86	0.3602	1.4204	0.3602	1.0602	98.6663	12.5944	12.5944	3.2202	0	0.3602		0.3602	1.0602	0		12.5944	86.0719	0		4.15076
	Kamensk	14	1.4	50.37	0.4	Jourdan et al. (2012)	Ar-Ar (impact glass)	2012	1			3.4041			0.8194			31.7019	3.4041	0	0	3.4041	0.8194	0	0	0.8194	31.7019	0	0	31.7019	4.3638
	Manson	20	2	75.9	0.1	Schmieder and Kring (2019) recalculated Izett (1998)	Ar-Ar (sanidine in melt breccia)	2019	1			6.3639			0.2447			3.99889	6.3639	0	0	6.3639	0.2447	0	0	0.2447	3.99889	0	0	3.99889	4.49008
	Clearwater West	20	2	286.2	2.6	Schmieder et al. (2015)	Ar-Ar (impact melt rock)	2015	3	6.8173	4.7813	2.036	2.5754	0	2.5754	116.751	0	38.0524	6.6007	0.2166	1.8194		1.8194	0.756	1.8194		38.0524	78.6981	38.0524		4.6
	Lawn Hill	10	1	476	8	Schmieder and Kring (2019) recalculated Darlington (2016)	Ar-Ar (impact melt breccia)	2019	5	21.172	10.177	10.995	4.6887	0	4.6887	46.0715	0	0	11.8451	9.3269	1.6681		0	4.6887	0		0	46.0715	0		4.9
	Haughton	13	1.3	23.4	1	Young et al. (2013)	Ar-Ar impactites	2013	2	1.6975	1.6039	0.0936	0.0936	0	0.0936	5.83578	0	0	1.6039	0.0936	0		0	0.0936	0		0	5.83578	0		4.90403
	Lappajarvi	13	1.3	77.85	0.78	Kenny et al. (2019)	U-Pb (zircon in impact melt rock)	2019	2	6.3639	6.12	0.2439	3.3171	0.2447	3.0724	118.379	3.99889	3.99889	6.3639	0	0.2439		0.2447	3.0724	0		3.99889	114.38	0		5	>>>	Schmieder & Kring (2019) reports 383-165 Ma and references unpublished data. Haines (2005) discusses Milton & Sutter (1987) who used Ar-Ar on relict melt rock
	Clearwater East	15	1.5	465	5	Schmieder et al. (2015)	Ar-Ar (impact melt rock)	2015	5	14.8657	6.8854	7.9803	5.3974	0	5.3974	75.6352	0	0	8.2771	6.5886	1.3917		0	5.3974	0		0	75.6352	0		5
	Gosses' Bluff	12	1.2	142.5	0.8	Haines (2005) discusses and uses Milton & Sutter (1987)	Ar-Ar minimum age (relict impact melt rock)	2005	2	3.3333	2.5959	0.7374	0.7374	0	0.7374	28.4063	0	28.4063	3.3333	0	0.7374		0.7374	0	0.7374		28.4063	0	28.4063		5
	Dellen	11	1.1	140.82	0.51	Mark et al. (2014)	Ar-Ar (impact melt rock)	2014	1			3.3333			0.7374			28.4063	3.3333	0	0	3.3333	0.7374	0	0	0.7374	28.4063	0	0	28.4063	5.40672
	Obolon'	11	1.1	169	7	Gurov et al. (2009)	K-Ar (impact melt rock)	2009	10	6.77	2.87	3.9	3.3	0	3.3	93.7	0	0	5.9242	0.8458	3.0542		0	3.3	0		0	93.7	0		5.54764
	Steen River	14	1.4	132	1.3	MacLagan et al. (2018)	U-Pb (SIMS, zircon in impact melt rock)	2018	2	3.5642	2.4072	1.157	0	0	0	0	0	0	2.4072	1.157	0		0	0	0		0	0	0		5.7
	El'gygytygn	10	1	3.65	0.08	Layer (2000)	Ar-Ar (impact melt rock)	2000	1			3.0826			1.1847			62.4216	3.0826	0	0	3.0826	1.1847	0	0	1.1847	62.4216	0	0	62.4216	6.03982
	Ries	14	1.4	14.08	0.038	Schmieder et al. 2018)	Ar-Ar (moldavite tektites)	2018	1			4.643			2.6133			128.753	4.643	0	0	4.643	2.6133	0	0	2.6133	128.753	0	0	128.753	6.97979
	Mistastin	16	1.6	37.83	0.05	Sylvester et al. (2013)	U–Pb (CA-TIMS, melt rock zircon)	2013	2	12.3694	3.6943	8.6751	8.6751	0.2916	8.3835	234.824	8.56967	8.56967	3.6943	8.6751	0		0.2916	8.3835	0		8.56967	226.254	0		7.44389
	Carswell	22	2.2	485.5	1.5	Alwmark et al. 2017	Ar-Ar (adularia in impact melt rock)	2017	2	27.5626	21.172	6.3906	17.1003	0	17.1003	163.447	0	0	21.172	6.3906	0		0	17.1003	0		0	163.447	0		8.2	>>>	Age is recalculated (measured age is 481.5 +-0.8), and also minimum age because it dates a vesicle cool-down event
	Boltysh	14	1.4	65.8	0.67	Kelley and Gurov (2002), recalculated Jourdan (2012)	Ar-Ar (impact melt rock)	2012	2	30.903	3.6643	27.2387	14.7579	0	14.7579	91.4079	0	91.4079	30.903	0	27.2387		14.7579	0	14.7579		91.4079	0	91.4079		8.33228
	Rochechouart	13	1.3	206.92	0.32	Cohen et al. (2017)	Ar-Ar (impact melt rock)	2017	1			16.6279			6.6671			66.9334	16.6279	0	0	16.6279	6.6671	0	0	6.6671	66.9334	0	0	66.9334	8.57487
	Chesapeake Bay	23	2.3	34.86	0.32	Assis Fernandes et al. (2019)	Ar-Ar (tektites and impact melt rock)	2019	1			12.3694			8.6751			234.824	12.3694	0	0	12.3694	8.6751	0	0	8.6751	234.824	0	0	234.824	10.6803
	Saint Martin	23	2.3	227.8	0.9	Schmieder et al. (2014)	Ar-Ar (impact-melted feldspar and melt rock)	2014	2	12.148	11.6945	0.4535	6.1428	0	6.1428	102.291	0	102.291	12.148	0	0.4535		6.1428	0	6.1428		102.291	0	102.291		12.7
	Charlevoix	31	3.1	446.5	6.5	Schmieder et al. (2019)	U-Pb (zircon in impact melt rock)	2019	5	29.78	7.98	29.78	20.3	0	20.3	213.8	0	0	10.539	19.241	2.559		0	20.3	0		0	213.8	0		12.9	>>>	Dates span a plausible range of 453-430. Tectonic constraint of ~440 minimum age. Middle of refined age range (446.5 Ma) taken as 'most probable' for computing purposes.
	Araguainha	23	2.3	251.5	2.9	Hauser et al. (2019)	U-Pb (SHRIMP, LAICP-MS, SIMS, monazite and zircon)	2019	3	51.3577	8.945	42.4127	22.9723	0	22.9723	80.93	0	80.93	51.3577	0	42.4127		22.9723	0	22.9723		80.93	0	80.93		16.6648
	Morokweng	40	4	146.06	0.16	Kenny et al. (2019)	Ar-Ar (impact melt rock)	2019	1			13.1446			4.7739			57.0311	13.1446	0	0	13.1446	4.7739	0	0	4.7739	57.0311	0	0	57.0311	21.5744
	Popigai	51	5.1	36.63	0.92	Schmieder and Kring (2019) recalculated Bottomley et al. (1987)	Ar-Ar (impact melt rock)	2019	1			12.3694			8.6751			234.824	12.3694	0	0	12.3694	8.6751	0	0	8.6751	234.824	0	0	234.824	21.6715
	Chicxulub	85	8.5	66.052	0.043	Renne et al. (2018)	Ar-Ar (impact melt rock and glassy microtektites)	2018	1			30.903			14.7579			91.4079	30.903	0	0	30.903	14.7579	0	0	14.7579	91.4079	0	0	91.4079	27.255
	Siljan	29	2.9	380.9	4.6	Jourdan and Reimold (2012)	Ar-Ar (impact melt rock)	2012	3	22.7787	10.8457	11.933	10.7	0	10.7	88.5857	0	11.3686	12.0787	10.7	1.233		1.233	9.467	1.233		11.3686	77.2171	11.3686		27.8125
	^see Schmieder & Kring (2019, Astrobiology) for full references
	*metrics may not pertain to the same substage (e.g. highest in one category may not be the highest in another, see "b")
	**mid-point of plausible range (see Coldwell & Pankhurst, 2019, JGS)
	Plots
	Crater diameter is plotted again extinction data treatments. The treatments plotten in SFig. 4a&b correspond to those in SFig. 2a&b respectively
	SFig. 4a						SFig. 4b
	Crater diameter vs. contemporary extinctin intensity (absolute) for meteorite impacts with age constraints that place each within a single geological substage, plotted by Kfs-poor or Kfs-rich						As Sfig 4a, using percentage above previous (Fig 2 in main text)

## Sheet: e Simultaneity
e	Simultaneity calculations: "is there statistically robust correlation between the timing of meteorite impact and extinction intensity increases"? and "is there a statistically robust difference between the degree of correlation between Kfs-rich ejecta blankets and extinction intensity increases, compared with the degree of correlation between meteorite impacts that did not produce a Kfs-rich blan…
	Introduction
	The R program "CoinCalc" (Siegmund et al. 2017, Computers and Geoscience vol. 98 pp 64-72, 10.1016/j.cageo.2016.10.004) was used to calculate the probability that the degree of simultaneity between the extiction events data and both meteorite impacts that caused Kfs pulses and those that did not.
	The entire palaeontological dataset of 167 substages (564 myr) were used.
	Users of CoinCalc can choose to allow for timelag and tolerance of coincidence. We set both to zero for all runs: only exact coincidences are counted. Calculations of "precursor" are not meaningful under these conditions and can be ignored.
	CoinCalc uses binarised data for time series analysis and thus only one impact per substage can be counted.
	A range of conditions were run, according to the effective temporal precision of the impact data and the datasets' completeness.
	This is because CoinCalc uses the frequency of an event to underpin the calculation of null hypothesis acceptance/rejection probability.
	For example, condition 1 uses the most precise data only, yet the smaller number of datapoints may overestimate the true probability
	Conversely, condition 3 uses the entire dataset, but using the 'most probable' substage does not capture the following observation:
	Kfs pulses either coincide with extinction events or they are neighbours, whereas NKfs data display a wide rang of proximity to extincton events.
	Data
	Oldest on left, most recent on right
	Extinction events (23)
	Ext	0	0	0	0	0	0	0	0	1	0	0	0	0	0	0	0	0	1	0	1	0	0	1	0	0	0	0	0	0	0	0	0	0	0	0	1	0	0	0	0	0	0	1	0	0	0	0	0
	Stage/substage	Upper Vendian	Lower Nemakit-Daldynian	Upper Nemakit-Daldynian	Lower Tommotian	Upper Tommotian	Lower Atdabanian	Upper Atdabanian	Lower Botomanian	Upper Botomanian	Lower Toyonian	Upper Toyonian	Lower Middle Cambrian	Lower Mid-Mid Cambrian	Upper Mid-Mid Cambrian	Lower Up-Mid Cambrian	Middle Up-Mid Cambrian	Upper Up-Mid Cambrian	Lower Dresbachian	Upper Dresbachian	Lower Franconian	Upper Franconian	Lower Trempealeauan	Upper Trempealeauan	Lower Tremadocian	Upper Tremadocian	Lower Arenig	Upper Arenig	Lower Llanvirn	Upper Llanvirn	Lower Llandeilo	Upper Llandeilo	Lower Caradoc	Middle Caradoc	Upper Caradoc	Lower Ashgill	Middle Ashgill	Upper Ashgill	Rhuddanian	Aeronian	Telychian	Sheinwoodian	Homerian	Gorstian	Ludfordian	Pridoli	Lower Gedinnian	Upper Gedinnian	Lower Siegenian
	Those meteorites that can only correspond to 1 palaeontological substage (condition 1)
	Kfs	0	0	0	0	0	0	0	0	0	0	0	0	0	0	0	0	0	0	0	0	0	0	0	0	0	0	0	0	0	0	0	0	0	0	0	0	0	0	0	0	0	0	0	0	0	0	0	0
	NKfs	0	0	0	0	0	0	0	0	0	0	0	0	0	0	0	0	0	0	0	0	0	0	0	0	0	0	0	0	0	0	0	0	0	0	0	0	0	0	0	0	0	0	0	0	0	0	0	0
	Above, plus those assigned to the most probable substage if a range extends into two bins (condition 2)
	Kfs	0	0	0	0	0	0	0	0	0	0	0	0	0	0	0	0	0	0	0	0	0	0	0	1	0	0	0	0	0	0	0	0	0	0	0	0	0	0	0	0	0	0	0	0	0	0	0	0
	NKfs	0	0	0	0	0	0	0	0	0	0	0	0	0	0	0	0	0	0	0	0	0	0	0	0	0	0	0	0	0	0	0	0	0	0	0	0	0	0	0	0	0	0	0	0	0	0	0	0
	All assigned to substage most probable in range (condition 3)
	Kfs	0	0	0	0	0	0	0	0	0	0	0	0	0	0	0	0	0	0	0	0	0	0	0	1	0	0	0	0	0	0	0	0	0	0	0	1	0	0	0	0	0	0	0	0	0	0	0	0
	NKfs	0	0	0	0	0	0	0	0	0	0	0	0	0	0	0	0	0	0	0	0	0	0	0	0	0	1	0	0	1	0	0	0	0	0	0	0	0	0	0	0	0	0	0	0	0	0	0	0
	All impacts	0	0	0	0	0	0	0	0	0	0	0	0	0	0	0	0	0	0	0	0	0	0	0	1	0	1	0	0	1	0	0	0	0	0	0	1	0	0	0	0	0	0	0	0	0	0	0	0
	Results
	Condition	Kfs/NKfs	Null Hyp.	Exact coincidence (%)	p-value (trigger)
	1	Kfs	F	100	5.85116e-06
		Nkfs	T
	2	Kfs	F	78	2.20298e-05
		Nkfs	T
	3	Kfs	F	75	2.12e-06
		all impacts	F	33	0.0173997
	R scripts
	The following can simply be cut and paste as scripts when the CoinCal package is installed in R
	Kfs condition 1
	#CoinCalc is used to conduct Event Coincidence Analysis for Time Series between
	#meteorite impact with Kfs pulse "Kfs" and
	#Extinction events "Ext".
	#Note that CoinCalc asks what the significance is of any coincidental relationship
	#of the timing of an eventA occuring with respect to the timing of an eventB.
	#To clarify, eventB is the independent variable (trigger).
	#The null hypothesis is that the number of coincidences can be explained by
	#two independent series of randomly distributed events.
	#Load libraries
	library("CoinCalc")
	#Load data: 167 substages in the raw Sepkoski Compendium (564 myr)
	#This script includes meteorite impacts that caused a Kfs 'pulse'
	#filtered to include only those that correspond to a single palaeontological substage.
	#note that these data are already binarised, and arranged in chronological order.
	#note also that CoinCalc assumes each substage is equal in length to its neighbour.
	#The actual substage length is not equal to its neighbour, yet
	#since we use a delT=0 and a tau=0, there is no effect.
	#the test of significance assumes each time series follows independent Poisson processes (are randomly distributed
	#and mutually independent)
	#Taking different tests of significance does not alter the outcome as the events are sufficiently rare.
	#Time series data
	Ext = c(0,0,0,0,0,0,0,0,1,0,0,0,0,0,0,0,0,1,0,1,0,0,1,0,0,0,0,0,0,0,0,0,0,0,0,1,0,0,0,0,0,0,1,0,0,0,0,0,0,0,0,0,0,0,1,0,0,1,0,0,1,0,0,1,0,1,0,0,0,0,0,0,0,0,0,0,0,0,0,0,0,1,0,1,0,0,0,0,0,0,0,0,0,1,0,0,0,1,1,0,0,0,0,0,1,0,0,0,0,0,0,0,0,0,0,0,0,0,0,0,0,0,1,0,0,0,0,0,0,0,0,1,0,0,0,0,0,0,1,0,0,0,0,0,0,0,0,0,1,0,0,0,0,0,0,0,1,0,0,0,0,1,0,0,1,0,0)
	Kfs = c(0,0,0,0,0,0,0,0,0,0,0,0,0,0,0,0,0,0,0,0,0,0,0,0,0,0,0,0,0,0,0,0,0,0,0,0,0,0,0,0,0,0,0,0,0,0,0,0,0,0,0,0,0,0,0,0,0,0,0,0,0,0,0,0,0,0,0,0,0,0,0,0,0,0,0,0,0,0,0,0,0,0,0,0,0,0,0,0,0,0,0,0,0,0,0,0,0,1,0,0,0,0,0,0,0,0,0,0,0,0,0,0,0,0,0,0,0,0,0,0,0,0,1,0,0,0,0,0,0,0,0,0,0,0,0,0,0,0,0,0,0,0,0,0,0,0,0,0,1,0,0,0,0,0,0,0,1,0,0,0,0,1,0,0,1,0,0)
	#conduct the Event Coincidence Analysis for Time Series between
	#meteorites with a Kfs pulse corresponging to one substage, and
	#Extinction Events for the past 564 million years
	out <- CC.eca.ts(Ext, Kfs, tau=0, delT=0)
	out
	#plot the relationship resulting from the above conditions.
	CC.plot(Ext, Kfs, tau=0, delT=0, seriesAname="Ext", seriesBname="Kfs")
	Kfs condition 2
	#CoinCalc is used to conduct Event Coincidence Analysis for Time Series between
	#meteorite impact with Kfs pulse "Kfs" and
	#Extinction events "Ext".
	#Note that CoinCalc asks what the significance is of any coincidental relationship
	#of the timing of an eventA occuring with respect to the timing of an eventB.
	#To clarify, eventB is the independent variable (trigger).
	#The null hypothesis is that the number of coincidences can be explained by
	#two independent series of randomly distributed events.
	#Load libraries
	library("CoinCalc")
	#Load data: 167 substages in the raw Sepkoski Compendium (564 myr)
	#This script includes meteorite impacts that caused a Kfs 'pulse',
	#binarised according to the most probable palaeontological substage and
	#filtered to include only those that correspond to one or two bins.
	#note that these data are already binarised, and arranged in chronological order.
	#note also that CoinCalc assumes each substage is equal in length to its neighbour.
	#The actual substage length is not equal to its neighbour, yet
	#since we use a delT=0 and a tau=0, there is no effect.
	#the test of significance assumes each time series follows independent Poisson processes (are randomly distributed
	#and mutually independent)
	#Taking different tests of significance does not alter the outcome as the events are sufficiently rare.
	#Time series data
	Ext = c(0,0,0,0,0,0,0,0,1,0,0,0,0,0,0,0,0,1,0,1,0,0,1,0,0,0,0,0,0,0,0,0,0,0,0,1,0,0,0,0,0,0,1,0,0,0,0,0,0,0,0,0,0,0,1,0,0,1,0,0,1,0,0,1,0,1,0,0,0,0,0,0,0,0,0,0,0,0,0,0,0,1,0,1,0,0,0,0,0,0,0,0,0,1,0,0,0,1,1,0,0,0,0,0,1,0,0,0,0,0,0,0,0,0,0,0,0,0,0,0,0,0,1,0,0,0,0,0,0,0,0,1,0,0,0,0,0,0,1,0,0,0,0,0,0,0,0,0,1,0,0,0,0,0,0,0,1,0,0,0,0,1,0,0,1,0,0)
	Kfs = c(0,0,0,0,0,0,0,0,0,0,0,0,0,0,0,0,0,0,0,0,0,0,0,1,0,0,0,0,0,0,0,0,0,0,0,0,0,0,0,0,0,0,0,0,0,0,0,0,0,0,0,0,0,0,0,0,0,0,0,0,0,0,0,0,0,0,0,0,0,0,0,0,0,0,0,0,0,0,0,0,0,0,0,0,0,0,0,0,0,0,0,0,0,1,0,0,0,1,0,0,0,0,0,0,0,0,0,0,0,0,0,0,0,0,0,0,0,0,0,0,0,0,1,0,0,0,0,0,0,0,0,0,0,0,0,0,0,0,0,0,0,0,0,0,0,0,0,0,1,0,0,0,0,0,0,1,1,0,0,0,0,1,0,0,1,0,0)
	#conduct the Event Coincidence Analysis for Time Series between
	#meteorites with a Kfs pulse corresponging to the most probable substage (1 or 2 possible bins), and
	#Extinction Events for the past 564 million years
	out <- CC.eca.ts(Ext, Kfs, tau=0, delT=0)
	out
	#plot the relationship resulting from the above conditions.
	CC.plot(Ext, Kfs, tau=0, delT=0, seriesAname="Ext", seriesBname="Kfs")
	Kfs condition 3
	#CoinCalc is used to conduct Event Coincidence Analysis for Time Series between
	#meteorite impact with Kfs pulse "Kfs" and
	#Extinction events "Ext".
	#Note that CoinCalc asks what the significance is of any coincidental relationship
	#of the timing of an eventA occuring with respect to the timing of an eventB.
	#To clarify, eventB is the independent variable (trigger).
	#The null hypothesis is that the number of coincidences can be explained by
	#two independent series of randomly distributed events.
	#Load libraries
	library("CoinCalc")
	#Load data: 167 substages in the raw Sepkoski Compendium (564 myr)
	#This script includes meteorite impacts that caused a Kfs 'pulse',
	#binarised according to the most probable palaeontological substage.
	#note that these data are already binarised, and arranged in chronological order.
	#note also that CoinCalc assumes each substage is equal in length to its neighbour.
	#The actual substage length is not equal to its neighbour, yet
	#since we use a delT=0 and a tau=0, there is no effect.
	#the test of significance assumes each time series follows independent Poisson processes (are randomly distributed
	#and mutually independent)
	#Taking different tests of significance does not alter the outcome as the events are sufficiently rare.
	#Time series data
	Ext = c(0,0,0,0,0,0,0,0,1,0,0,0,0,0,0,0,0,1,0,1,0,0,1,0,0,0,0,0,0,0,0,0,0,0,0,1,0,0,0,0,0,0,1,0,0,0,0,0,0,0,0,0,0,0,1,0,0,1,0,0,1,0,0,1,0,1,0,0,0,0,0,0,0,0,0,0,0,0,0,0,0,1,0,1,0,0,0,0,0,0,0,0,0,1,0,0,0,1,1,0,0,0,0,0,1,0,0,0,0,0,0,0,0,0,0,0,0,0,0,0,0,0,1,0,0,0,0,0,0,0,0,1,0,0,0,0,0,0,1,0,0,0,0,0,0,0,0,0,1,0,0,0,0,0,0,0,1,0,0,0,0,1,0,0,1,0,0)
	Kfs = c(0,0,0,0,0,0,0,0,0,0,0,0,0,0,0,0,0,0,0,0,0,0,0,1,0,0,0,0,0,0,0,0,0,1,0,0,0,0,0,0,0,0,0,0,0,0,0,0,0,0,0,0,0,0,0,0,1,0,0,0,0,0,0,0,0,0,0,0,0,0,0,0,0,0,0,0,0,0,0,0,0,0,0,1,0,0,0,0,0,0,0,0,0,1,0,0,0,1,0,0,0,0,0,0,0,0,0,0,0,0,0,0,0,0,0,0,0,0,0,0,0,0,1,0,0,0,0,0,0,0,0,0,0,0,0,0,0,0,0,0,0,0,0,0,0,0,0,0,1,0,0,0,0,0,0,1,1,0,0,0,0,1,0,0,1,0,0)
	#conduct the Event Coincidence Analysis for Time Series between
	#meteorites with a Kfs pulse corresponging to the most probable substage, and
	#Extinction Events for the past 564 million years
	out <- CC.eca.ts(Ext, Kfs, tau=0, delT=0)
	out
	#plot the relationship resulting from the above conditions.
	CC.plot(Ext, Kfs, tau=0, delT=0, seriesAname="Ext", seriesBname="Kfs")
	NKfs condition 1
	#CoinCalc is used to conduct Event Coincidence Analysis for Time Series between
	#meteorite impact with no Kfs pulse "NKfs" and
	#Extinction events "Ext"
	#note that CoinCalc asks what the significance is of any coincidental relationship
	#of the timing of an eventA occuring with respect to the timing of an eventB
	#to clarify, eventB is the independent variable (trigger)
	#the null hypothesis is that the number of coincidences can be explained by
	#two independent series of randomly distributed events
	#Load libraries
	library("CoinCalc")
	#Load data: 167 substages in the raw Sepkoski Compendium (564 myr)
	#This script includes meteorite impacts that did not cause a Kfs 'pulse',
	#filtered to include only those that correspond to a single palaeontological substage.
	#note that these data are already binarised, and arranged in chronological order.
	#note also that CoinCalc assumes each substage is equal in length to its neighbour.
	#The actual substage length is not equal to its neighbour, yet
	#since we use a delT=0 and a tau=0, there is no effect.
	#the test of significance assumes each time series follows independent Poisson processes (are randomly distributed
	#and mutually independent)
	#Taking different tests of significance does not alter the outcome as the events are sufficiently rare.
	#Time series data
	Ext = c(0,0,0,0,0,0,0,0,1,0,0,0,0,0,0,0,0,1,0,1,0,0,1,0,0,0,0,0,0,0,0,0,0,0,0,1,0,0,0,0,0,0,1,0,0,0,0,0,0,0,0,0,0,0,1,0,0,1,0,0,1,0,0,1,0,1,0,0,0,0,0,0,0,0,0,0,0,0,0,0,0,1,0,1,0,0,0,0,0,0,0,0,0,1,0,0,0,1,1,0,0,0,0,0,1,0,0,0,0,0,0,0,0,0,0,0,0,0,0,0,0,0,1,0,0,0,0,0,0,0,0,1,0,0,0,0,0,0,1,0,0,0,0,0,0,0,0,0,1,0,0,0,0,0,0,0,1,0,0,0,0,1,0,0,1,0,0)
	NKfs = c(0,0,0,0,0,0,0,0,0,0,0,0,0,0,0,0,0,0,0,0,0,0,0,0,0,0,0,0,0,0,0,0,0,0,0,0,0,0,0,0,0,0,0,0,0,0,0,0,0,0,0,0,0,0,0,1,0,0,0,0,0,0,0,0,0,0,0,0,0,0,0,0,0,0,0,0,0,0,0,0,0,0,0,0,0,0,0,0,0,0,0,0,0,0,0,1,0,0,0,0,0,0,0,0,0,0,0,0,0,0,0,0,0,0,0,0,0,0,0,0,0,0,0,0,1,0,0,0,0,0,0,0,0,0,0,0,0,0,0,0,0,0,0,0,0,0,1,0,0,0,0,0,0,1,0,0,0,0,0,0,0,0,0,0,0,0,0)
	#conduct the Event Coincidence Analysis for Time Series between
	#meteorites with no Kfs pulse corresponging to one substage, and
	#Extinction Events for the past 564 million years
	out <- CC.eca.ts(Ext, NKfs, tau=0, delT=0)
	out
	#plot the relationship resulting from the above conditions.
	CC.plot(Ext, NKfs, tau=0, delT=0, seriesAname="Ext", seriesBname="NKfs")
	NKfs condition 2
	#CoinCalc is used to conduct Event Coincidence Analysis for Time Series between
	#meteorite impact with no Kfs pulse "NKfs" and
	#Extinction events "Ext".
	#Note that CoinCalc asks what the significance is of any coincidental relationship
	#of the timing of an eventA occuring with respect to the timing of an eventB.
	#To clarify, eventB is the independent variable (trigger).
	#The null hypothesis is that the number of coincidences can be explained by
	#two independent series of randomly distributed events.
	#Load libraries
	library("CoinCalc")
	#Load data: 167 substages in the raw Sepkoski Compendium (564 myr)
	#This script includes meteorite impacts that did not cause a Kfs 'pulse',
	#binarised according to the most probable palaeontological substage and
	#filtered to include only those that correspond to one or two bins.
	#note that these data are already binarised, and arranged in chronological order.
	#note also that CoinCalc assumes each substage is equal in length to its neighbour.
	#The actual substage length is not equal to its neighbour, yet
	#since we use a delT=0 and a tau=0, there is no effect.
	#the test of significance assumes each time series follows independent Poisson processes (are randomly distributed
	#and mutually independent)
	#Taking different tests of significance does not alter the outcome as the events are sufficiently rare.
	#Time series data
	Ext = c(0,0,0,0,0,0,0,0,1,0,0,0,0,0,0,0,0,1,0,1,0,0,1,0,0,0,0,0,0,0,0,0,0,0,0,1,0,0,0,0,0,0,1,0,0,0,0,0,0,0,0,0,0,0,1,0,0,1,0,0,1,0,0,1,0,1,0,0,0,0,0,0,0,0,0,0,0,0,0,0,0,1,0,1,0,0,0,0,0,0,0,0,0,1,0,0,0,1,1,0,0,0,0,0,1,0,0,0,0,0,0,0,0,0,0,0,0,0,0,0,0,0,1,0,0,0,0,0,0,0,0,1,0,0,0,0,0,0,1,0,0,0,0,0,0,0,0,0,1,0,0,0,0,0,0,0,1,0,0,0,0,1,0,0,1,0,0)
	NKfs = c(0,0,0,0,0,0,0,0,0,0,0,0,0,0,0,0,0,0,0,0,0,0,0,0,0,0,0,0,0,0,0,0,0,0,0,0,0,0,0,0,0,0,0,0,0,0,0,0,0,0,0,0,0,0,0,1,0,0,0,0,0,0,0,0,0,0,0,0,0,0,0,0,0,0,0,0,0,0,0,0,0,0,0,0,0,0,0,0,0,0,0,0,0,0,0,1,0,0,0,0,0,0,1,0,0,0,0,0,0,0,0,0,0,0,0,0,0,0,0,0,0,0,0,1,1,0,0,0,1,0,1,0,0,0,0,0,0,0,0,0,0,0,0,0,0,0,1,0,0,0,0,0,0,1,0,0,0,0,1,0,0,0,0,0,0,0,0)
	#conduct the Event Coincidence Analysis for Time Series between
	#meteorites with no Kfs pulse corresponging to the most probable substage (1 or 2 possible bins), and
	#Extinction Events for the past 564 million years
	out <- CC.eca.ts(Ext, NKfs, tau=0, delT=0)
	out
	#plot the relationship resulting from the above conditions.
	CC.plot(Ext, NKfs, tau=0, delT=0, seriesAname="Ext", seriesBname="NKfs")
	NKfs condition 3
	#CoinCalc is used to conduct Event Coincidence Analysis for Time Series between
	#meteorite impact with no Kfs pulse "NKfs" and
	#Extinction events "Ext".
	#Note that CoinCalc asks what the significance is of any coincidental relationship
	#of the timing of an eventA occuring with respect to the timing of an eventB.
	#To clarify, eventB is the independent variable (trigger).
	#The null hypothesis is that the number of coincidences can be explained by
	#two independent series of randomly distributed events.
	#Load libraries
	library("CoinCalc")
	#Load data: 167 substages in the raw Sepkoski Compendium (564 myr)
	#This script includes meteorite impacts that did not cause a Kfs 'pulse',
	#binarised according to the most probable palaeontological substage.
	#note that these data are already binarised, and arranged in chronological order.
	#note also that CoinCalc assumes each substage is equal in length to its neighbour.
	#The actual substage length is not equal to its neighbour, yet
	#since we use a delT=0 and a tau=0, there is no effect.
	#the test of significance assumes each time series follows independent Poisson processes (are randomly distributed
	#and mutually independent)
	#Taking different tests of significance does not alter the outcome as the events are sufficiently rare.
	#Time series data
	Ext = c(0,0,0,0,0,0,0,0,1,0,0,0,0,0,0,0,0,1,0,1,0,0,1,0,0,0,0,0,0,0,0,0,0,0,0,1,0,0,0,0,0,0,1,0,0,0,0,0,0,0,0,0,0,0,1,0,0,1,0,0,1,0,0,1,0,1,0,0,0,0,0,0,0,0,0,0,0,0,0,0,0,1,0,1,0,0,0,0,0,0,0,0,0,1,0,0,0,1,1,0,0,0,0,0,1,0,0,0,0,0,0,0,0,0,0,0,0,0,0,0,0,0,1,0,0,0,0,0,0,0,0,1,0,0,0,0,0,0,1,0,0,0,0,0,0,0,0,0,1,0,0,0,0,0,0,0,1,0,0,0,0,1,0,0,1,0,0)
	NKfs = c(0,0,0,0,0,0,0,0,0,0,0,0,0,0,0,0,0,0,0,0,0,0,0,0,0,1,0,0,1,0,0,0,0,0,0,0,0,0,0,0,0,0,0,0,0,0,0,0,0,0,0,0,0,0,0,1,0,0,0,0,0,0,0,0,0,0,0,0,0,0,0,0,0,0,0,0,1,0,0,0,0,0,0,0,0,0,0,0,0,0,0,0,0,0,0,1,0,0,0,0,0,0,1,0,0,0,0,0,0,1,0,0,0,0,0,0,0,0,0,0,0,0,0,1,1,0,0,0,1,0,1,0,0,0,0,0,0,0,0,0,0,0,0,0,0,0,1,0,0,0,0,0,0,1,0,0,0,0,1,0,0,0,0,0,0,0,0)
	#conduct the Event Coincidence Analysis for Time Series between
	#meteorites with no Kfs pulse corresponging to the most probable substage, and
	#Extinction Events for the past 564 million years
	out <- CC.eca.ts(Ext, NKfs, tau=0, delT=0)
	out
	#plot the relationship resulting from the above conditions.
	CC.plot(Ext, NKfs, tau=0, delT=0, seriesAname="Ext", seriesBname="NKfs")
	Meteorite Impact
	#CoinCalc is used to conduct Event Coincidence Analysis for Time Series between
	#meteorite impact "MI" and
	#Extinction events "Ext".
	#Note that CoinCalc asks what the significance is of any coincidental relationship
	#of the timing of an eventA occuring with respect to the timing of an eventB.
	#To clarify, eventB is the independent variable (trigger).
	#The null hypothesis is that the number of coincidences can be explained by
	#two independent series of randomly distributed events.
	#Load libraries
	library("CoinCalc")
	#Load data: 167 substages in the raw Sepkoski Compendium (564 myr)
	#This script includes all meteorite impacts >16 km transient crater diameter with accurate ages
	#binarised according to the most probable palaeontological substage.
	#note that these data are already binarised, and arranged in chronological order.
	#note also that CoinCalc assumes each substage is equal in length to its neighbour.
	#The actual substage length is not equal to its neighbour, yet
	#since we use a delT=0 and a tau=0, there is no effect.
	#the test of significance assumes each time series follows independent Poisson processes (are randomly distributed
	#and mutually independent)
	#Taking different tests of significance does not alter the outcome as the events are sufficiently rare.
	#Time series data
	Ext = c(0,0,0,0,0,0,0,0,1,0,0,0,0,0,0,0,0,1,0,1,0,0,1,0,0,0,0,0,0,0,0,0,0,0,0,1,0,0,0,0,0,0,1,0,0,0,0,0,0,0,0,0,0,0,1,0,0,1,0,0,1,0,0,1,0,1,0,0,0,0,0,0,0,0,0,0,0,0,0,0,0,1,0,1,0,0,0,0,0,0,0,0,0,1,0,0,0,1,1,0,0,0,0,0,1,0,0,0,0,0,0,0,0,0,0,0,0,0,0,0,0,0,1,0,0,0,0,0,0,0,0,1,0,0,0,0,0,0,1,0,0,0,0,0,0,0,0,0,1,0,0,0,0,0,0,0,1,0,0,0,0,1,0,0,1,0,0)
	MI = c(0,0,0,0,0,0,0,0,0,0,0,0,0,0,0,0,0,0,0,0,0,0,0,1,0,1,0,0,1,0,0,0,0,1,0,0,0,0,0,0,0,0,0,0,0,0,0,0,0,0,0,0,0,0,0,1,1,0,0,0,0,0,0,0,0,0,0,0,0,0,0,0,0,0,0,0,1,0,0,0,0,0,0,1,0,0,0,0,0,0,0,0,0,1,0,1,0,1,0,0,0,0,1,0,0,0,0,0,0,1,0,0,0,0,0,0,0,0,0,0,0,0,1,1,1,0,0,0,1,0,1,0,0,0,0,0,0,0,0,0,0,0,0,0,0,0,1,0,1,0,0,0,0,1,0,1,1,0,1,0,0,1,0,0,1,0,0)
	#conduct the Event Coincidence Analysis for Time Series between
	#meteorite impacts corresponging to the most probable substage, and
	#Extinction Events for the past 564 million years
	out <- CC.eca.ts(Ext, MI, tau=0, delT=0)
	out
	#plot the relationship resulting from the above conditions.
	CC.plot(Ext, MI, tau=0, delT=0, seriesAname="Ext", seriesBname="MI")
	Discussion
	Seven Kfs pulses could have each only occurred within a single substage. Each of these bins also witnessed an extinction event. The null hypothesis that the degree of exact simultaneity is the result of random coincidences is rejected at a confidence interval of p<0.00005. The use of a subset understates the true frequency of known Kfs pulses, thus the significance value when using this subset is…
	Including the most probable substage of Kfs pulses for those whose age span extends across two bins dataset (n = 10) results in the number of exact matches rising to 10 and a p value of <0.00005. The lower average precision leads to a lower rate of exact simultaneity (78%; recall overlap does not count as a coincident event). When the full dataset of every known Kfs pulse is included exact simult…
	In direct contrast, the null hypothesis is accepted for ejecta blankets that did not cause a Kfs-pulse at every step. What is not captured by the simultaneity test is that non-Kfs ejecta blankets display a wide range of temporal proximity to extinction episodes, and only 1/18 could plausibly overlap them.
[truncated: 119 more columns]
